# Supplementary material for: TFAP2A Induced KRT16 as an Oncogene in Lung Adenocarcinoma via EMT
Source: PubMed Central journal article supplement — Int J Biol Sci. 2019 Jun 2;15(7):1419–28. doi: 10.7150/ijbs.34076 (PMC6643144; doi:10.7150/ijbs.34076), 2019-06-02

Table S1,

| <b>qPCR</b>      | <b>Forward Primer</b> | <b>Reverse Primer</b>   |
|------------------|-----------------------|-------------------------|
| <b>KRT16</b>     | GACCGGCGGAGATGTGAAC   | CTGCTCGTACTGGTCACGC     |
| <b>GAPDH</b>     | GGAGCGAGATCCCTCCAAAAT | GGCTGTTGTCATACTTCTCATGG |
| <b>E-Cad</b>     | ATTTTCCCTCGACACCCGAT  | TCCCAGGCGTAGACCAAGA     |
| <b>N-Cad</b>     | TCAGGCGTCTGTAGAGGCTT  | ATGCACATCCTTCGATAAGACTG |
| <b>Vimentin</b>  | AGTCCACTGAGTACCGGAGAC | CATTTACGCATCTGGCGTTC    |
| <b>TFAP2A</b>    | GACTCGGAGACCTCTCGATCC | GACGGCATTGCTGTTGGAC     |
|                  |                       |                         |
| <b>ChIP-qPCR</b> | Forward Primer        | Reverse Primer          |
| <b>KRT16</b>     | GGCCGAGAGAAAACACAGAA  | TCTGAAGGGCTGACTCACTG    |
| <b>EIF4A2</b>    | TTTTGTAGCTGACCGAAGCA  | GCGCCCTATGACCTTCACTA    |

Table S2,

| <b>Antibody list</b>   | <b>Company</b> | <b>Lot. No.</b> | <b>Dilution</b>                   | <b>Host</b> |
|------------------------|----------------|-----------------|-----------------------------------|-------------|
| <b>KRT16</b>           | Abcam          | ab76416         | 1:5000 (for WB), 1: 200 (for IHC) | Rabbit      |
| <b>E-Cad</b>           | CST            | #3195           | 1:1000                            | Rabbit      |
| <b>N-Cad</b>           | CST            | #13116          | 1:1000                            | Rabbit      |
| <b>Vimentin</b>        | CST            | #5741           | 1:1000                            | Rabbit      |
| <b>GAPDH</b>           | Santa Cruz     | sc-47724        | 1:1000                            | mouse       |
| <b>H3K4me3</b>         | Abcam          | ab8580          | 1:100 (for ChIP)                  | Rabbit      |
| <b>TFAP2A</b>          | Abcam          | ab52222         | 1:100 (for ChIP)                  | Rabbit      |
| <b>Anti-mouse IgG</b>  | CST            | #14709          | 1:5000                            | Goat        |
| <b>Anti-rabbit IgG</b> | CST            | #14708          | 1:5000                            | Goat        |

Figure S1,

a

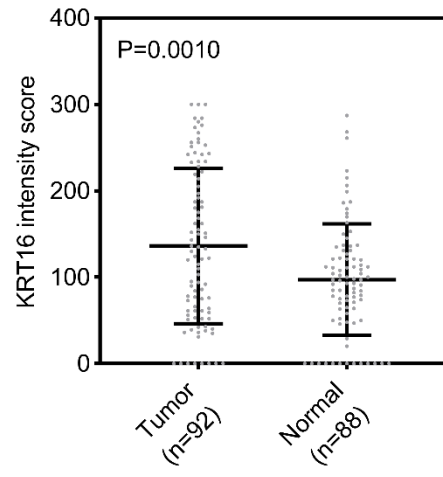

b

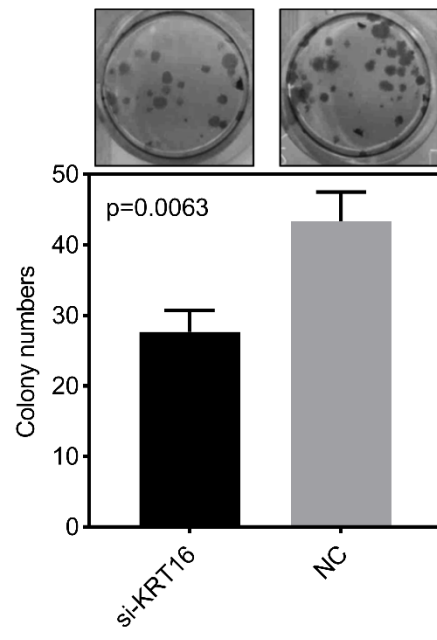

Supplement: ijbsv15p1419s1.pdf [file ijbsv15p1419s1.pdf]
